1           **Inhibiting *Mycobacterium tuberculosis* ClpP1P2 by**  
2           **addressing the equatorial handle domain of ClpP1 subunit**

3

4           **Yang Yang<sup>1#</sup>, Yibo Zhu<sup>1#</sup>, Tao Yang<sup>1#</sup>, Tao Li<sup>1</sup>, Yuan Ju<sup>1</sup>, Yingjie**  
5           **Song<sup>1</sup>, Jun He<sup>1</sup>, Huanxiang Liu<sup>2</sup>, Rui Bao<sup>1\*</sup> and Youfu Luo<sup>1\*</sup>**

6           <sup>1</sup> Center of Infectious Diseases, State Key Laboratory of Biotherapy,  
7           West China Hospital, Sichuan University, Chengdu, 610041, China

8           <sup>2</sup> School of Pharmacy, Lanzhou University, Lanzhou, 730000, China

9

10

11

12

13           \*Address correspondence to R.B. and Y.F.L.

14           E-mail: baorui@scu.edu.cn; luo\_youfu@scu.edu.cn

15

16

17           # These authors contributed equally to this work.

18

19 **Abstract**

20 Unlike other bacterial ClpP systems, mycobacterial ClpP1P2 complex is essential  
21 for mycobacterial survival. The functional details of *Mycobacterium tuberculosis* (*Mtb*)  
22 ClpP1P2 remains largely elusive and selectively targeting ClpP of different species is a  
23 big challenge. In this work, cediranib was demonstrated to significantly decrease the  
24 activity of *Mtb*ClpP1P2. By solving the crystal structure of cediranib-bound  
25 *Mtb*ClpP1P2, we found that cediranib dysregulates *Mtb*ClpP1P2 by interfering with  
26 handle domain of the equatorial region of *Mtb*ClpP1, indicating that the inter-ring  
27 dynamics are crucial for its function. This finding provides direct evidence for the  
28 notion that a conformational switch in the equatorial handle domain is essential for ClpP  
29 activity. We also present biochemical data to interpret the distinct interaction pattern  
30 and inhibitory properties of cediranib toward *Mtb*ClpP1P2. These results suggest that  
31 the variable handle domain region is responsible for the species-selectivity of cediranib,  
32 which suggests the equatorial handle domain as a potential region for screening  
33 pathogen-specific ClpP inhibitors.

34 **Introduction**

35 Caseinolytic protease ClpP, a widely conserved self-compartmentalizing serine  
36 protease in bacteria, plays essential roles in protein metabolism and regulates diverse  
37 physiological functions including cell motility, genetic competence, cell differentiation,  
38 sporulation, and virulence, and is thus an attractive target for antibiotic development[1-  
39 8]. Notably, ClpP is a novel drug target for which both inhibition and activation result  
40 in an attenuated or lethal phenotype in many pathogens; thus agonists and antagonists

41 aimed at the ClpP system represent promising drug candidates for further evaluation[9,  
42 10]. The ClpP enzyme of *Mycobacterium tuberculosis* (*MTB*), *MtbClpP1P2*, exerts its  
43 proteolytic function by a heterotetramer of two protein subunits, ClpP1 and ClpP2[11,  
44 12]. Moreover, encoding genes of subunits ClpP1 and ClpP2, have been shown to be  
45 essential genes for *MTB* survival and the deletion of either gene causes bacterial  
46 death[13]. A panel of *MtbClpP1P2* inhibitors have been reported and they can be  
47 classified into two categories depending on their action modes. The first kind of small  
48 molecules act on the catalytically active center, covalently modifying the serine  
49 residues of the active sites of two subunits of *MtbClpP1P2*, including bortezomib,  
50 boron-containing analogues and beta lactones[14-17]. The second kind of inhibitors act  
51 on the chaperone protein (ClpX/ClpC1) binding site that competitively binds to the  
52 surface of the ClpP2 subunit. Representative molecules of this category are ADEP and  
53 its analogs[12]. Since the chaperones binding L/IGF region of ClpP2 subunit is highly  
54 conserved, as with the inhibitor of the *MtbClpP1P2* catalytic center[18], the ADEP  
55 compounds are nonselective as well. As we know, the off-target effects may bring  
56 severe side effects during drug development. Thus it is desirable to find novel binding  
57 pocket or selective inhibitors targeting *MtbClpP1P2* to avoid the potential adverse  
58 effects of nonselective ones. In this work, we demonstrate that cediranib, an orally  
59 available vascular endothelial growth factor receptor 2 (VEGFR-2) inhibitor, is able to  
60 inhibit *MtbClpP1P2* peptidase activity. We solved the crystal structure of *MtbClpP1P2*  
61 in complex with an agonist peptide and cediranib, and present details of the inhibitory  
62 mechanism. Unlike other ClpP inhibitors, cediranib dysregulates *MtbClpP1P2* by

63 interfering with the equatorial region of *Mtb*ClpP1, supporting the idea that the inter-  
64 ring dynamics are crucial for ClpP function. We also present biochemical data  
65 suggesting that this mechanism is distinct from those of previously reported ClpP  
66 inhibitors. These results reveal a novel druggable pocket in *Mtb*ClpP1P2, with potential  
67 implications for further research on ClpP catalytic mechanism and drug development.

## 68 **Results**

### 69 **Identification of cediranib as a novel inhibitor of *Mtb*ClpP1P2**

70 We screened about 2600 bioactive compounds (MedChemExpress, HY-L001)  
71 based on a peptidase activity assay. Eight compounds (hit rate 0.31%) that generated  
72  $\geq 80\%$  inhibition of *Mtb*ClpP1P2 were selected for IC<sub>50</sub> value evaluation (Fig 1A).  
73 Among these hits, cediranib and brivanib, which possesses an indolyl group, showed  
74 promising inhibitory effects toward *Mtb*ClpP1P2 peptidase activity; cediranib had a  
75 lower IC<sub>50</sub> value (3.4  $\mu$ M) than brivanib (12.5  $\mu$ M) (Fig 1A and 1B). In addition,  
76 cediranib (100 $\mu$ M) led to a peak shift of 10°C in the thermal stability of *Mtb*ClpP1P2  
77 in differential scanning calorimetry (DSC) assay, which confirms their direct interaction  
78 in solution (S1 Fig).

79 To dissect whether cediranib is a species-selective inhibitor, we profiled its  
80 peptidase inhibitory effects against a panel of ClpPs from *Escherichia coli* (*Ec*ClpP),  
81 *Pseudomonas aeruginosa* (*Pa*ClpP1), and *Staphylococcus aureus* (*Sa*ClpP) (Table 1  
82 and S2 Fig). The results show that cediranib has no obvious inhibitory effect on those  
83 ClpP variants. In contrast, cediranib demonstrated non-competitive inhibition of  
84 *Mtb*ClpP1P2 (Fig1C), indicating that it may not form covalent bonds with the protease.

85 To validate the antibacterial activity of cediranib, we carried out growth inhibition  
86 assays on several pathogenic bacteria. As Table 1 and Table 2 show, cediranib had no  
87 inhibitory activity toward *S. aureus*, *P. aeruginosa*, *Escherichia coli* and *Enterococcus*  
88 *faecalis* (minimum inhibitory concentration [MIC] >128 µg/mL), while it was toxic to  
89 *E. faecium*, *Staphylococcus epidermidis*, *Klebsiella pneumoniae* and *Mycobacterium*  
90 *smegmatis* MC<sup>2</sup>155 (MIC 64 µg/mL). Cediranib inhibited the growth of *Mtb* H37Rv  
91 with an MIC value of 16 µg/mL. Therefore, cediranib exhibits species-selectivity in  
92 suppressing pathogen growth. Next, we performed peptidase assay on human ClpP  
93 (*hClpP*) to estimate the toxicity of cediranib to human mitochondria. As shown in Table  
94 1 and S2 Fig, cediranib displayed weak inhibition of *hClpP* activity compared to  
95 *MtbClpP1P2*, with a selectivity index >10.

96 To gain insights into the inhibitory mechanism of cediranib, we purified and  
97 crystallized *MtbClpP1P2* in complex with cediranib and benzoyl-Leu-Leu (Bz-LL).  
98 The crystals belonged to space group C121 and diffracted to 2.7 Å resolution. The  
99 structure was determined by molecular replacement using the previously solved  
100 *MtbClpP1P2* structure (PDB code 5DZK) as a search model, and the final model was  
101 refined to an Rfactor of 20.02% (Rfree =24.33%) (Table 3)[19]. The asymmetric unit  
102 has one hetero-tetradecameric complex structure composed of heptameric ClpP1 and  
103 ClpP2 rings (Fig 2A). The organization and overall structure remain identical to those  
104 in benzyloxycarbonyl-Ile-Leu (Z-IL)-bound and Bz-LL-bound *MtbClpP1P2*  
105 structures[12, 19], presenting an open-pore conformation with 30 and 25 Å diameters  
106 in the ClpP1 and P2 rings, respectively (Fig 2B).

107 *MtbClpP1* and *MtbClpP2* share high sequence identity (48%) and have a common  
108 core structure, which adopts an  $\alpha/\beta$ -fold consisting of two central twisted  $\beta$ -sheets  
109 flanked by seven  $\alpha$ -helices and an extended handle domain (Fig 2C). The N-terminal  
110 regions of *MtbClpP2* are in an extended  $\beta$ -hairpin conformation, and are further  
111 stabilized by the *MtbClpP2* ring from the crystallographic symmetry unit. The typical  
112 catalytic triad (Ser-His-Asp) locates in the cleft between the core domain and the handle  
113 domain; all 14 active sites distribute on the inner surface of the assembled *MtbClpP1P2*  
114 complex and eventually form the hydrolytic chamber. Bz-LL peptides occupied all  
115 cleavage centers in the *MtbClpP1ClpP2* tetradecamer, whereas seven cediranib  
116 molecules bound within the cleft between *MtbClpP1* monomers.

117 Self-association is a common and well-conserved property of Clp protease. The  
118 inter-ring interactions are mediated by the handle domain, a strand-turn-helix motif that  
119 forms the equatorial regions of the ClpP barrel[20-24]. Compared with the Bz-LL-  
120 bound *MtbClpP1ClpP2* structure[19], the additional binding of cediranib slightly reduced  
121 the interface area between *MtbClpP1* monomers (from 1356 Å<sup>2</sup> to 1116 Å<sup>2</sup>), but does  
122 not change the assembly state of the whole complex, suggesting that the inhibitory  
123 mechanism of cediranib is different from that of compounds that disrupt the  
124 oligomerization of the ClpP complex[25].

### 125 **Cediranib-bound *MtbClpP1P2* structure reveals a novel inhibitor binding-site**

126 As previously reported[12, 19], the binding sites of Bz-LL and Z-IL are aligned  
127 parallel to  $\beta$ -strands 6 and 8 in each subunit and the agonist peptides form several  
128 hydrogen bonds with protein main-chain atoms. However, because *MtbClpP2* has a

129 longer loop after the  $\beta$ G strand (residues 127–129) and thus generates a shallower S1  
130 pocket, Bz-LL is bound in opposite orientations in *MtbClpP1* and *MtbClpP2* (Fig 3A),  
131 supporting the notion that *MtbClpP1* and *MtbClpP2* have different substrate  
132 specificities[26]. In *MtbClpP1*, around the Bz-LL binding site, the averaged 2Fo–Fc  
133 electron-density map allowed us to unambiguously build the cediranib molecules  
134 between  $\alpha$ 5 and  $\alpha$ 3 (Fig 3B and 3C). Cediranib binds this site predominantly via  
135 hydrophobic interactions, while its indolyl group forms a cation– $\pi$  interaction with  
136 Arg119 (Fig 2D). Additionally, the quinazoline ring of cediranib interacts with the  
137 aromatic rings from Trp174 and the benzoyl group of Bz-LL, resembling a  $\pi$ – $\pi$  stacking  
138 interaction. In contrast to *MtbClpP1*, the corresponding sites in *MtbClpP2* generate a  
139 more compact pore, where  $\alpha$ 5 moves closer to  $\alpha$ 3 and the large side chains of Met160  
140 and Phe83 restrict accessibility to this pocket, making cediranib unable to bind to  
141 *MtbClpP2* (Fig 3D).

142 Unlike the peptidyl inhibitors that occupy the S1–S3 subsites of ClpP[27],  
143 cediranib does not directly interact with the active site, but interferes with the dynamic  
144 handle region, which was proposed to be responsible for product release[21, 28](Fig  
145 3C and 3E). Though a small channel in the variable handle region of *MtbClpP1* was  
146 observed in ADEP-*MtbClpP1P2* complex in previous study[12], we firstly  
147 demonstrated this small channel could be occupied by a small molecule, herein  
148 cediranib, and be employed to realize *MtbClpP* selectivity. As Fig 3F illustrates, the  
149 cediranib-binding pocket is formed by  $\alpha$ 5 (residues Gln142–Glu149),  $\alpha$ 3 (residues  
150 Ile71–Ala76) and three short  $\beta$ -sheets ( $\beta$ D,  $\beta$ F,  $\beta$ H) from the neighboring ClpP1 subunit.

151 It is worth noting that  $\alpha 5$  is the major part of the handle domain.

152 **Molecular dynamics simulation studies revealed cediranib interferes the**  
153 **conformational changes of *Mtb*ClpP1**

154 Previous molecular dynamics simulation studies on SaClpP revealed that  $\alpha 5$   
155 adopts a kinked conformation by breaking the helix at residue Lys145 (corresponding  
156 to Val145 in *Mtb*ClpP1)[24]. During the reaction cycle, the handle domain undergoes  
157 an unfolding/refolding process, allowing the whole cylindrical ClpP barrel to adopt  
158 extended, compact and compressed states[23, 24, 29-31]. In order to analysis the effect  
159 of cediranib on the dynamic transition of handle domain, we performed a 500-ns MD  
160 simulation on *Mtb*ClpP1 dimer (chain B and M) with/without cediranib (S3 Fig). The  
161 r.m.s. deviation (RMSD) values of C $\alpha$  from the head domain and handle domain were  
162 monitored, the results indicated that handle domain underwent dramatic conformational  
163 changes during the simulation, whereas both the head domain and handle domian of B  
164 chain was more stable than that of M chain( S3A Fig and S3C Fig). Next, the secondary  
165 structure transformation of handle domain were calculated along the trajectory of  
166 simulation by DSSP[24] (S3B Fig and S3D Fig). The profile revealed that the N-  
167 terminal part of helix E (residues 133–158) underwent a helical unfolding/refolding  
168 process. In the absence of cediranib, the N-terminal part (residues 133–137) in chain B  
169 primarily adopted turn structure in 0-350 ns. Then, residues 133–154 adopted coil , turn  
170 and 3-10Helix structures. In chain M, residues 143–147 mainly adopted turn structure.  
171 With binding of cediranib, the N-terminal part(residues 133–137) of chain B adoped  
172 coil and turn strcture in the initial stage (0–300 ns). Subsequently(300-500ns), these



173 residues gradually readopted some 3-10Helix and  $\alpha$ -helix. By contrast to chain B, chain  
174 M was much more unstable, particularly at 250ns, most  $\alpha$ -helix structure adopted turn  
175 and coil (S3B Fig and S3D Fig). To identify the most significant motions of handle  
176 domain of *Mtb*ClpP1 dimer induced by cediranib, we performed PCA using the MD  
177 trajectory[24]. As shown in S3E Fig and S3F Fig, during the conformational transition,  
178 four intermediate conformations (see the 50-ns, 100-ns,300-ns, and 500-ns snapshots  
179 in Fig 3E and 3F) was observed. Based on the results of MD simulation and PCA, we  
180 constructed a rough energy landscape for the conformational transition of *Mtb*ClpP1  
181 dimer projected onto the first two principal components, PC1 and PC2. Obviously, the  
182 binding of cediranib to *Mtb*ClpP1 interferes the conformational changes, likely  
183 preventing the protease from accomplishing the enzymatic process.

#### 184 **Mutagenesis and functional analysis of the cediranib-binding site**

185 As we known, the ClpPs from different species share high sequence similarity  
186 (55.0–90.9%) and conserved overall structure (Fig 4A). Consistently, the general and  
187 critical gating mechanism of ClpP requires the handle domain to preserve its structural  
188 integrity[29]. In the dynamic region of the handle domain (Ser132–Val145 in  
189 *Mtb*ClpP1), several sites involved in structural stabilization have been identified to be  
190 important for ClpP function: Gln132/Glu135 in *Sa*ClpP (corresponding to  
191 Ser132/Asp135 in *Mtb*ClpP1, interacting with Arg171)[23]; Ile149/Ile151 in *Ec*ClpP  
192 (corresponding to Ile136/Ile138 in *Mtb*ClpP1)[21]; and Ala153 in *Streptococcus*  
193 *pneumoniae* ClpP (corresponding to Ala140 in *Mtb*ClpP1) (Fig 3F)[22]. Thus, the  
194 cediranib-bound *Mtb*ClpP1P2 structure provides additional evidence to highlight the

195 critical role of the handle region.

196 To investigate the residues in the cediranib-binding pocket, we introduced  
197 different mutations in relevant sites based on sequence alignment (Fig 4B and Table 4).  
198 Consistent with the importance of the equatorial pore and handle domain, most site-  
199 directed mutations in the selected sites decreased or abolished *MtbClpP1P2* activity.  
200 Considering Ile71, Met75, Ile146 and Trp174, even when residues with similar side  
201 chains were substituted in those sites, the enzyme activity was not retained, suggesting  
202 there are constraints on both residue size and chemical properties to maintain the local  
203 structural integrity and flexibility (Table 4 and Fig 4C).

204 An electrostatic interaction between two *MtbClpP1* subunits (Arg119–Gln142)  
205 (Fig 3F) seems to be an important factor mediating the side pore gating, because any  
206 substitution that changed the charge properties of either site resulted in reduced or  
207 abolished activity. In contrast, sites Met95 and Glu149 of *MtbClpP1* exhibit various  
208 levels of tolerance to mutation. In particular, Met95Gln and Glu149Leu variants retain  
209 activity and have altered sensitivity of *MtbClpP1P2* to cediranib, providing a structural  
210 basis for the specific recognition between cediranib and *MtbClpP1* (Table 4).

## 211 **Discussion**

212 ClpP represents a unique type of serine protease complex responsible for the  
213 proteolysis of damaged or misfolded proteins. Because it plays critical roles in the  
214 regulation of infectivity and virulence of many bacterial pathogens and is involved in  
215 various human diseases, interfering with ClpP activity has been evaluated as a potential

216 therapeutic strategy in the treatment of different ailments[32]. In-depth understanding  
217 of the mechanism of ClpP reaction and regulation is crucial for development of  
218 chemotherapeutic agents that target this protein. The importance of the dynamic  
219 equatorial region in ClpP has long been recognized[21-24, 29-31].

220 As the first identified inhibitor targeting flexible handle region of ClpP, cediranib  
221 shows a distinct inhibitory mechanism. The cediranib-bound *Mtb*ClpP1P2 complex  
222 structure provides valuable evidence to support the important roles of equatorial handle  
223 domain for ClpP function<sup>[21][26]</sup>. Compared with the highly conserved critical residues  
224 in the N-terminal region of  $\alpha 5$  (Ile136, Ile138, and Ala140 in *Mtb*ClpP1) (Fig 4C),  
225 residues participating in cediranib binding are relatively diverse among different ClpP  
226 homologs, leading to a substantial variation in the size of the binding pockets near to  
227 the side pores, which suggests this mechanism could be employed for pathogen-  
228 selective ClpP inhibitor development.

## 229 **Materials and Methods**

230 **Bacterial strains and culture conditions.** *Escherichia coli* DH5 $\alpha$  and BL21 (DE3)  
231 were cultured at 37 °C in Luria broth (LB) and LB-agar plates. DNA encoding *M.*  
232 *tuberculosis* ClpP1 and ClpP2 (spanning residues 7–200 and 13–214, respectively) was  
233 cloned into a pRSF-Duet vector preceded by an N-terminal His<sub>6</sub>-SUMO tag  
234 (Novagen)[11, 12]. Full-length *Ec*ClpP, *Sa*ClpP, *Pa*ClpP1 and the *h*ClpP gene without  
235 its mitochondrial targeting sequence (residues Met1–Pro57) were also respectively  
236 cloned into pRSF-Duet preceded by an N-terminal His<sub>6</sub>-SUMO tag[33-35]. PCR was  
237 performed with PrimeSTAR<sup>®</sup> max DNA polymerase (Takara) and *Ex Taq*<sup>®</sup> polymerase

238 (Takara). The plasmids carrying distinct ClpP genes were transformed into *Escherichia*  
239 *coli* BL21 (DE3) cells (TransGen Biotech). The plasmids and primers used in this study  
240 are listed in Appendix Table S1 and Appendix Table S2.

241 **Protein expression and purification.** *M. tuberculosis* ClpP1 (residues 7–200) and  
242 ClpP2 (residues 13–214) with N-terminal His<sub>6</sub>-SUMO tags were expressed and purified  
243 as described, with minor modifications[11, 12, 14]. In short, ClpP1 and ClpP2 were  
244 individually overexpressed in *E. coli* strain BL21 (DE3) in LB broth at 16 °C, following  
245 induction with 0.5 mM isopropyl β-D-1-thiogalactopyranoside for about 16 h with  
246 shaking at 220 rpm in medium supplemented with 50 µg/mL kanamycin. Cells were  
247 resuspended and lysed in buffer containing 50 mM K<sub>2</sub>HPO<sub>4</sub>/KH<sub>2</sub>PO<sub>4</sub>, pH 7.6, 500 mM  
248 KCl, 10% glycerol and 0.5 mM dithiothreitol. His-tagged *Mtb*ClpP1/*Mtb*ClpP2  
249 proteins were purified using a nickel affinity column and eluted with the same buffer  
250 supplemented with 250 mM imidazole. The His<sub>6</sub>-SUMO tag of eluted proteins was  
251 removed using ubiquitin-like-protease 1 (ULP1) at 4 °C. The tag-free proteins were  
252 further purified by anion exchange chromatography (MonoQ; GE Healthcare). Peak  
253 fractions were collected, concentrated and applied to Superdex 200 16/600 (GE  
254 Healthcare) preequilibrated with buffer containing 10 mM HEPES, pH 7.5, 50 mM  
255 NaCl and 2 mM dithiothreitol for final purification. Purified ClpP1 and ClpP2 were  
256 concentrated in Amicon centrifugal concentration devices (Millipore) to >80 µM  
257 tetradecamer. *Ec*ClpP, *Sa*ClpP, *Pa*ClpP1 and *h*ClpP proteins were expressed as  
258 described above. These proteins were purified using a nickel affinity column and then  
259 incubated with ULP1 at 4 °C to cleave the His<sub>6</sub>-SUMO tag[36].

260 **Compound screening.** The peptidase activity of *Mtb*ClpP1P2 was monitored at 30 °C  
261 in black 96-well plates, as described[11, 14]. After peptide bond cleavage, the  
262 fluorophore 7-amino-4-methylcoumarin of the fluorogenic substrate Z-Gly-Gly-Leu-  
263 AMC is liberated and can be quantified. Briefly, each well contained 100 μM  
264 fluorogenic peptide, 0.5 μM tetradecamer ClpP1P2, and 2 mM Bz-LL in 80 μL of buffer  
265 containing 50 mM phosphate buffer, pH 7.6, 300 mM KCl, 5 mM MgCl<sub>2</sub> and 5%  
266 glycerol. Substrate cleavage was monitored using an all-in-one microplate reader (Gen5;  
267 BioTek) by exciting at 380 nm and following the increase in fluorescence emission at  
268 460 nm. The deviation of fluorescence value in at least two independent measurements  
269 was ≤5%. The screening assay was carried out in 96-well format as described above,  
270 and about 2600 compounds were screened at 100 μM. Positive (bortezomib) and  
271 negative controls (dimethyl sulfoxide; DMSO) were included on every plate and were  
272 used to assess the performance of the primary screen. Bz-LL was purchased from GL  
273 Biochem (Shanghai) Ltd. Cediranib was purchased from MedChemExpress.

274 **IC<sub>50</sub> determination.** To determine the potency of the 8 “hit” compounds against  
275 *Mtb*ClpP1P2, these compounds were tested at concentrations ranging from 1 to 100 μM  
276 in a 96-well plate format. The reaction mix contained 0.5 μM *Mtb*ClpP1P2  
277 tetradecamer and 2 mM Bz-LL, with 0.8 μL of each dilution of the compound or DMSO  
278 in a total volume of 80 μL. The reaction was initiated by addition of 0.8 μL of 10 mM  
279 fluorogenic substrate Z-Gly-Gly-Leu-AMC (100 μM final concentration) to the  
280 reaction mix. Initial velocity data was obtained by the monitoring increase in the  
281 fluorescence due to hydrolysis of the substrate using the microplate reader at 10-min

282 intervals over 60 min. The IC<sub>50</sub> value for each compound was obtained by nonlinear  
283 regression curve fitting of a four-parameter variable slope equation to the dose–  
284 response data using Prism software.

285 The peptidase activity of *Ec*ClpP, *Sa*ClpP, *Pa*ClpP1 and *h*ClpP was determined using a  
286 fluorescence-based assay with Suc-LY-AMC as the substrate, according to literature  
287 protocols[33-35]. The reaction mix contained 0.5 μM *Ec*ClpP/2.5 μM *Sa*ClpP/0.5 μM  
288 *Pa*ClpP/3 μM *h*ClpP tetradecamer, with 0.8 μL of each dilution of the test compound  
289 or DMSO in a total volume of 80 μL. The IC<sub>50</sub> values for cediranib against *Ec*ClpP,  
290 *Sa*ClpP, *Pa*ClpP1 and *h*ClpP were obtained as described above.

291 Non-competitive inhibition was investigated by using 0.5 μM *Mtb*ClpP1P2  
292 tetradecamer and 2 mM Bz-LL with different concentrations of cediranib. An  
293 equivalent volume of DMSO was added to the control group. The serially diluted  
294 substrate (500, 400, 300, 200, 100 and 50 μM) was added into wells of a 96-well plate  
295 and incubated for 30min at room temperature. Fluorescence was measured at 30 °C  
296 using the microplate reader (excitation, 380 nm; emission, 460 nm) for 1 h[9].

297 **Crystallization.** Cediranib-*Mtb*ClpP1P2 complex crystals were prepared by the  
298 hanging drop method referring to previously published works[12, 19]. The precipitant  
299 solution consisted of 1.5 M (NH<sub>4</sub>)<sub>2</sub>SO<sub>4</sub> and 0.1 M MES, pH 6.5. A drop contained a  
300 mixture of 2 μL protein (about 2.5 mg/mL ClpP1 and ClpP2, 0.2 mM cediranib maleate,  
301 5 mM Bz-LL, 10 mM HEPES, 50 mM NaCl, 2 mM DTT, pH 7.5) and 2 μL of  
302 precipitant solution and was incubated at 18 °C for about 3 months. Crystals were  
303 soaked briefly in 2 M Li<sub>2</sub>SO<sub>4</sub> solution and were stored in liquid nitrogen.

304 **Data collection and structure determination.** The X-ray data were collected with a  
305 CCD camera at station BL-19U of the Shanghai synchrotron radiation facility (SSRF),  
306 Shanghai, China. The diffraction data were indexed, integrated, and scaled using the  
307 HKL2000 program suite[37]. The process of structure building and refinement was  
308 monitored using the COOT and PHENIX suites[38, 39]. The PDB code for the co-  
309 crystal structure of cediranib with *Mtb*ClpP1P2 (resolution 2.7 Å) is 6IW7.

310 **DSC.** DSC-based analysis of the thermal denaturation of proteins provides an approach  
311 for measuring protein–ligand interactions[40]. Samples for DSC were prepared  
312 following the operating manual of the instrument. *Mtb*ClpP1P2 was dissolved to a final  
313 concentration of 0.5 mg/mL. The molar ratio between *Mtb*ClpP1P2 and compounds  
314 was 10:1 in reaction cells. DSC measurements were performed using a VP-DSC Micro  
315 Calorimeter (Microcal, USA) at a scan rate of 0.5–2 °C/min in the temperature range  
316 10–110 °C. Six-pair blank cells with buffer (50 mM phosphate buffer, pH 7.6, 300 mM  
317 KCl, 5 mM MgCl<sub>2</sub> and 5% glycerol, with the same volume of DMSO) were prepared  
318 to obtain instrumental baselines, which were systematically subtracted from the sample  
319 experimental thermograms. A thermal transition curve was obtained from a plot of heat  
320 capacity against temperature.

321 **Mutagenesis.** Thirty-one mutations were introduced by site-directed mutagenesis,  
322 primers are listed in Appendix Table S3. The PCR products were extracted with PCR  
323 purification kits (Takara 9761) and ligated using a Blunting Kination Ligation Kit  
324 (Takara 6217). The mutated sequences of the ClpP1 gene were confirmed by DNA  
325 sequencing (Tsingke). Variant ClpP1 proteins were expressed in *Escherichia coli* BL21

326 (DE3) for enzymatic cleavage assays. The IC<sub>50</sub> values of cediranib toward *Mtb*ClpP1P2  
327 mutants were determined in the same way as that for wild-type *Mtb*ClpP1P2.

328 **Molecular Dynamics Simulations.** The molecular dynamics simulations were  
329 performed in AMBER 14 software package[41]. The initial coordinates for molecular  
330 dynamics simulation were firstly prepared through structural inspection and  
331 optimization in Schrödinger software suite[42]. In the tleap module of AMBER,  
332 *Mtb*ClpP1P2 dimer was solvated in a rectangular water box of TIP3P and neutralized  
333 with Na<sup>+</sup> ions. The periodic boundary conditions were setup with all the solvents 10 Å  
334 away from the solutes. The protein were parameterized using the AMBER FF99SB  
335 force field[43] and the ligands were parameterized using the GAFF force field[44].  
336 Energy minimization was performed firstly to remove the local atomic collision in the  
337 systems and the combination of the descent steepest with conjugated gradient method  
338 was adopted in the process. In the NVT ensemble, the systems were heated from 0 to  
339 310 K gradually and the solutes were restrained with harmonic force constant 5  
340 kcal/mol/Å<sup>2</sup> simultaneously. Five equilibration stages were performed to adjust the  
341 solvents density. Finally, 500ns conventional molecular dynamics (cMD) simulations  
342 were performed in the NPT ensemble, with coordinates saved every 5 ps throughout the  
343 entire process.

344 **Data analysis for MD simulation.** Root-mean-square deviation (RMSD) for the  
345 proteins and ligands during the simulations were calculated using the CPPTRAJ  
346 module[45] of AmberTools 13 package[41] to characterize the conformational change  
347 of the proteins and ligands. Standardized secondary structures assignment analysis were



348 calculated with the DSSP algorithm using the AmberTools 13 package, which can  
349 characterize the propensities of secondary structures for each residue during the  
350 simulations. Then the heatmap for DSSP analysis was plotted using the MATLAB  
351 package (MathWorks, USA). Principal Component Analysis (PCA) analysis on the  
352 basis of covariance matrix was carried out using the program Carma[46] to address the  
353 collective motions of *Mtb*ClpP1P2. A two-dimensional representation of Free Energy  
354 Landscape (FEL) was built based on the PCA analysis, and two dominant components  
355 of PC1 and PC2 were selected as the reaction coordinates. The FEL along the reaction  
356 coordinates could be calculated using the following equation[47]:

$$357 \quad \Delta G(\text{PC1}, \text{PC2}) = -\kappa_B T \ln g(\text{PC1}, \text{PC2})$$

358 where T and  $\kappa_B$  represent the temperature of MD simulations and the Boltzmann  
359 constant, respectively. The  $g(\text{PC1}, \text{PC2})$  is the normalized joint probability. Then the  
360 structures for the lowest energy in FEL were extracted as the representative  
361 conformation of each energy basin. These representative structures were superimposed  
362 to the initial crystal structure for comparison.

### 363 **Acknowledgements**

364 We would like to thank Professor Jikui Song for generously sharing the plasmids used  
365 to generate ClpPs proteins. X-ray diffraction image collection, analysis and  
366 computation work were performed using the workstations at Shanghai Synchrotron  
367 Radiation Facility.

### 368 **Author contributions**

369 **Conceptualization:** Youfu Luo.

370 **Data curation:** Yang Yang, Yibo Zhu and Huanxiang Liu.

371 **Formal analysis:** Yang Yang, Yibo Zhu, Tao Yang, Tao Li, Yuan Ju, Yingjie Song,  
372 Huanxiang Liu, Jun He, Rui Bao and Youfu Luo.

373 **Funding acquisition:** Rui Bao and Youfu Luo.

374 **Investigation:** Yang Yang, Yibo Zhu, Tao Yang, Tao Li, Yuan Ju, Yingjie Song, Jun He  
375 and Huanxiang Liu.

376 **Resources:** Rui Bao and Youfu Luo.

377 **Supervision:** Tao Yang, Rui Bao and Youfu Luo.

378 **Validation:** Yang Yang, Yibo Zhu, Tao Yang, Rui Bao and Youfu Luo.

379 **Visualization:** Yang Yang, Yibo Zhu and Rui Bao.

380 **Writing-original draft:** Yang Yang, Yibo Zhu, Tao Yang, Rui Bao and Youfu Luo.

381 **Writing-review & editing:** Yang Yang, Rui Bao and Youfu Luo.

## 382 **Competing interests**

383 The authors declare no competing interests.

## 384 **References**

- 385 1. Olivares AO, Baker TA, Sauer RT. Mechanistic insights into bacterial AAA+ proteases and  
386 protein-remodelling machines. *Nat Rev Microbiol.* 2016;14(1):33-44. [https://doi.org/10.1038/](https://doi.org/10.1038/nrmicro.2015.4)  
387 [nrmicro.2015.4](https://doi.org/10.1038/nrmicro.2015.4) PMID:26639779.
- 388 2. Bhandari V, Wong KS, Zhou JL, Mabanglo MF, Batey RA, Houry WA. The Role of ClpP  
389 Protease in Bacterial Pathogenesis and Human Diseases. *ACS Chem Biol.* 2018;13(6):1413-25.  
390 <https://doi.org/10.1021/acscchembio.8b00124> PMID:29775273.
- 391 3. Sassetti CM, Boyd DH, Rubin EJ. Genes required for mycobacterial growth defined by high  
392 density mutagenesis. *Mol Microbiol.* 2003;48(1):77-84. [https://doi.org/10.1046/j.13652958.2003.](https://doi.org/10.1046/j.13652958.2003.03425.x)  
393 [03425.x](https://doi.org/10.1046/j.13652958.2003.03425.x) PMID:12657046.
- 394 4. Brötz-Oesterhelt H, Beyer D, Kroll H-P, Endermann R, Ladel C, Schroeder W, et al.  
395 Dysregulation of bacterial proteolytic machinery by a new class of antibiotics. *Nat Med.*  
396 2005;11(10):1082-7. <https://doi.org/10.1038/nm1306> PMID: 16200071
- 397 5. Conlon BP, Nakayasu ES, Fleck LE, LaFleur MD, Isabella VM, Coleman K, et al. Activated  
398 ClpP kills persisters and eradicates a chronic biofilm infection. *Nature.* 2013;503(7476):365-70.

- 399 [https://doi:10.1038/nature12790](https://doi.org/10.1038/nature12790) PMID:24226776.
- 400 6. Moreno-Cinos C, Sasseti E, Salado IG, Witt G, Benramdane S, Reinhardt L, et al. alpha-Amino  
401 Diphenyl Phosphonates as Novel Inhibitors of Escherichia coli ClpP Protease. *J Med Chem.*  
402 2019;62(2):774-97. [https://doi:10.1021/acs.jmedchem.8b01466](https://doi.org/10.1021/acs.jmedchem.8b01466) PMID:30571121.
- 403 7. Fraga H, Rodriguez B, Bardera A, Cid C, Akopian T, Kandror O, et al. Development of high  
404 throughput screening methods for inhibitors of ClpC1P1P2 from Mycobacteria tuberculosis.  
405 *Anal Biochem.* 2019;567:30-7. [https://doi:10.1016/j.ab.2018.12.004](https://doi.org/10.1016/j.ab.2018.12.004).
- 406 8. Markus Lakemeyer EB, Friederike Mdler, D ra, Balogh RS, Hendrik Dietz, Stephan Axel,  
407 Sieber. Tailored Peptide Phenyl Esters Block ClpXP Proteolysis by an Unusual Breakdown into  
408 a Heptamer–Hexamer Assembly. *Angew Chem Int Ed.* 2019;58:1-7. [https://doi:10.1002/anie.201901056](https://doi.org/10.1002/anie.201901056) PMID: 30829431
- 410 9. Vahidi S, Ripstein ZA, Bonomi M, Yuwen T, Mabanglo MF, Juravsky JB, et al. Reversible  
411 inhibition of the ClpP protease via an N-terminal conformational switch. *Proc Natl Acad Sci U*  
412 *S A.* 2018;115(28):E6447-E56. [https://doi:10.1073/pnas.1805125115](https://doi.org/10.1073/pnas.1805125115) PMID: 29941580
- 413 10. Ollinger J, O'Malley T, Kesicki EA, Odingo J, Parish T. Validation of the Essential ClpP  
414 Protease in Mycobacterium tuberculosis as a Novel Drug Target. *J Bacteriol.* 2012;194(3):663-  
415 8.
- 416 11. Akopian T, Kandror O, Raju RM, Unnikrishnan M, Rubin EJ, Goldberg AL. The active ClpP  
417 protease from *M. tuberculosis* is a complex composed of a heptameric ClpP1 and a ClpP2 ring.  
418 *EMBO J.* 2012;31(6):1529-41. [https://doi:10.1038/emboj.2012.5](https://doi.org/10.1038/emboj.2012.5) PMID:22286948.
- 419 12. Schmitz KR, Carney DW, Sello JK, Sauer RT. Crystal structure of Mycobacterium tuberculosis  
420 ClpP1P2 suggests a model for peptidase activation by AAA+ partner binding and substrate  
421 delivery. *Proc Natl Acad Sci U S A.* 2014;111(43):E4587-95. [https://doi:10.1073/pnas.141712-0111](https://doi.org/10.1073/pnas.141712-0111) PMID:25267638.
- 423 13. Raju RM, Unnikrishnan M, Rubin DH, Krishnamoorthy V, Kandror O, Akopian TN, et al.  
424 Mycobacterium tuberculosis ClpP1 and ClpP2 function together in protein degradation and are  
425 required for viability in vitro and during infection. *PLoS Pathog.* 2012;8(2):e1002511.  
426 [https://doi:10.1371/journal.ppat.1002511](https://doi.org/10.1371/journal.ppat.1002511) PMID: 22359499
- 427 14. Compton CL, Schmitz KR, Sauer RT, Sello JK. Antibacterial activity of and resistance to small  
428 molecule inhibitors of the ClpP peptidase. *ACS Chem Biol.* 2013;8(12):2669-77.  
429 [https://doi:10.1021/cb400577b](https://doi.org/10.1021/cb400577b) PMID:24047344.
- 430 15. Akopian T, Kandror O, Tsu C, Lai JH, Wu W, Liu Y, et al. Cleavage Specificity of  
431 Mycobacterium tuberculosis ClpP1P2 Protease and Identification of Novel Peptide Substrates  
432 and Boronate Inhibitors with Anti-bacterial Activity. *J Biol Chem.* 2015;290(17):11008-20.  
433 [https://doi:10.1074/jbc.M114.625640](https://doi.org/10.1074/jbc.M114.625640) PMID:25759383.
- 434 16. Moreira W, Ngan GJ, Low JL, Poulsen A, Chia BC, Ang MJ, et al. Target mechanism-based  
435 whole-cell screening identifies bortezomib as an inhibitor of caseinolytic protease in  
436 mycobacteria. *mBio.* 2015;6(3):e00253-15. [https://doi:10.1128/mBio.00253-15](https://doi.org/10.1128/mBio.00253-15) PMID:25944-  
437 857.
- 438 17. Moreira W, Santhanakrishnan S, Ngan GJY, Low CB, Sangthongpitag K, Poulsen A, et al.  
439 Towards Selective Mycobacterial ClpP1P2 Inhibitors with Reduced Activity against the Human  
440 Proteasome. *Antimicrob Agents Chemother.* 2017;61(5). [https://doi:10.1128/AAC.02307-16](https://doi.org/10.1128/AAC.02307-16)  
441 PMID:28193668.
- 442 18. Lee BG, Park EY, Lee KE, Jeon H, Sung KH, Paulsen H, et al. Structures of ClpP in complex

- 443 with acyldepsipeptide antibiotics reveal its activation mechanism. *Nat Struct Mol Biol.*  
444 2010;17(4):471-8. <https://doi.org/10.1038/nsmb.1787> PMID:20305655.
- 445 19. Li M, Kandrór O, Akopian T, Dharkar P, Wlodawer A, Maurizi MR, et al. Structure and  
446 Functional Properties of the Active Form of the Proteolytic Complex, ClpP1P2, from  
447 *Mycobacterium tuberculosis*. *J Biol Chem.* 2016;291(14):7465-76. <https://doi.org/10.1074/jbc.M115.700344> PMID:26858247.
- 449 20. Ingvarsson H, Mate MJ, Hogbom M, Portnoi D, Benaroudj N, Alzari PM, et al. Insights into the  
450 inter-ring plasticity of caseinolytic proteases from the X-ray structure of *Mycobacterium*  
451 *tuberculosis* ClpP1. *Acta Crystallogr D Biol Crystallogr.* 2007;63(Pt 2):249-59. <https://doi.org/10.1107/S0907444906050530> PMID:17242518.
- 453 21. Sprangers R, Gribun A, Hwang PM, Houry WA, Kay LE. Quantitative NMR spectroscopy of  
454 supramolecular complexes: dynamic side pores in ClpP are important for product release. *Proc*  
455 *Natl Acad Sci U S A.* 2005;102(46):16678-83. <https://doi.org/10.1073/pnas.0507370102> PMID:16-  
456 263929.
- 457 22. Gribun A, Kimber MS, Ching R, Sprangers R, Fiebig KM, Houry WA. The ClpP double ring  
458 tetradecameric protease exhibits plastic ring-ring interactions, and the N termini of its subunits  
459 form flexible loops that are essential for ClpXP and ClpAP complex formation. *J Biol Chem.*  
460 2005;280(16):16185-96. <https://doi.org/10.1074/jbc.M414124200> PMID:15701650.
- 461 23. Zhang J, Ye F, Lan L, Jiang H, Luo C, Yang CG. Structural switching of *Staphylococcus aureus*  
462 Clp protease: a key to understanding protease dynamics. *J Biol Chem.* 2011;286(43):37590-601.  
463 <https://doi.org/10.1074/jbc.M111.277848> PMID:21900233.
- 464 24. Ye F, Zhang J, Liu H, Hilgenfeld R, Zhang R, Kong X, et al. Helix unfolding/refolding  
465 characterizes the functional dynamics of *Staphylococcus aureus* Clp protease. *J Biol Chem.*  
466 2013;288(24):17643-53. <https://doi.org/10.1074/jbc.M113.452714> PMID:23625918.
- 467 25. Gersch M, Kolb R, Alte F, Groll M, Sieber SA. Disruption of oligomerization and  
468 dehydroalanine formation as mechanisms for ClpP protease inhibition. *J Am Chem Soc.*  
469 2014;136(4):1360-6. <https://doi.org/10.1021/ja4082793> PMID:24106749.
- 470 26. Personne Y, Brown AC, Schuessler DL, Parish T. *Mycobacterium tuberculosis* ClpP Proteases  
471 Are Co-transcribed but Exhibit Different Substrate Specificities. *PLoS One.* 2013;8(4):e60228.  
472 <https://doi.org/10.1371/journal.pone.0060228> PMID:23560081
- 473 27. Szyk A, Maurizi MR. Crystal structure at 1.9 Å of *E. coli* ClpP with a peptide covalently bound  
474 at the active site. *J Struct Biol.* 2006;156(1):165-74. <https://doi.org/10.1016/j.jsb.2006.03.013>  
475 PMID:16682229.
- 476 28. Mundra S, Thakur V, Bello AM, Rathore S, Asad M, Wei L, et al. A novel class of Plasmodial  
477 ClpP protease inhibitors as potential antimalarial agents. *Bioorg Med Chem.* 2017;25(20):5662-  
478 77. <https://doi.org/10.1016/j.bmc.2017.08.049> PMID:28917450.
- 479 29. Liu K, Ologbenla A, Houry WA. Dynamics of the ClpP serine protease: a model for self-  
480 compartmentalized proteases. *Crit Rev Biochem Mol Biol.* 2014;49(5):400-12.  
481 <https://doi.org/10.3109/10409238.2014.925421> PMID:24915503.
- 482 30. Lee BG, Kim MK, Song HK. Structural insights into the conformational diversity of ClpP from  
483 *Bacillus subtilis*. *Molecules and cells.* 2011;32(6):589-95. <https://doi.org/10.1007/s10059-011-0197-1> PMID:22080375.
- 485 31. Geiger SR, Bottcher T, Sieber SA, Cramer P. A conformational switch underlies ClpP protease  
486 function. *Angew Chem Int Ed.* 2011;50(25):5749-52. <https://doi.org/10.1002/anie.201100666>

- 487 PMID:21544912.
- 488 32. Dougan DA, Hantke I, Turgay K. Dysregulating ClpP: From Antibiotics to Anticancer? *Cell*  
489 *Chem Biol.* 2018;25(8):929-30. [https://doi:10.1016/j.chembiol.2018.08.002](https://doi.org/10.1016/j.chembiol.2018.08.002) PMID:30118671.
- 490 33. Hackl MW, Lakemeyer M, Dahmen M, Glaser M, Pahl A, Lorenz-Baath K, et al. Phenyl Esters  
491 Are Potent Inhibitors of Caseinolytic Protease P and Reveal a Stereogenic Switch for  
492 Deoligomerization. *J Am Chem Soc.* 2015;137(26):8475-83. [https://doi:10.1021/jacs.5b03084](https://doi.org/10.1021/jacs.5b03084)  
493 PMID:26083639.
- 494 34. Hall BM, Breidenstein EBM, de la Fuente-Nunez C, Reffuveille F, Mawla GD, Hancock REW,  
495 et al. Two Isoforms of Clp Peptidase in *Pseudomonas aeruginosa* Control Distinct Aspects of  
496 Cellular Physiology. *J Bacteriol.* 2017;199(3). [https://doi:10.1128/JB.00568-16](https://doi.org/10.1128/JB.00568-16) PMID:2784-  
497 9175.
- 498 35. Gronauer TF, Mandl MM, Lakemeyer M, Hackl MW, Messner M, Korotkov VS, et al. Design  
499 and synthesis of tailored human caseinolytic protease P inhibitors. *Chem Commun (Camb).*  
500 2018;54(70):9833-6. [https://doi:10.1039/c8cc05265d](https://doi.org/10.1039/c8cc05265d) PMID:30109319.
- 501 36. Zhang Z-M, Ma K-W, Yuan S, Luo Y, Jiang S, Hawara E, et al. Structure of a pathogen effector  
502 reveals the enzymatic mechanism of a novel acetyltransferase family. *Nat Struct Mol Biol.*  
503 2016;23(9):847-52. [https://doi:10.1038/nsmb.3279](https://doi.org/10.1038/nsmb.3279) PMID:27525589.
- 504 37. Z O, W M. Processing of X-ray diffraction data collected in oscillation mode. *Methods Enzymol.*  
505 1997;276(97):307-26 PMID:27754618.
- 506 38. Adams PD, Afonine PV, Bunkoczi G, Chen VB, Davis IW, Echols N, et al. PHENIX: a  
507 comprehensive Python-based system for macromolecular structure solution. *Acta Crystallogr D*  
508 *Biol Crystallogr.* 2010;66(Pt 2):213-21. [https://doi:10.1107/S0907444909052925](https://doi.org/10.1107/S0907444909052925) PMID:2012-  
509 4702.
- 510 39. Emsley P, Lohkamp B, Scott WG, Cowtan K. Features and development of Coot. *Acta*  
511 *Crystallogr D Biol Crystallogr.* 2010;66(Pt 4):486-501. [https://doi:10.1107/S09074449100-](https://doi.org/10.1107/S09074449100-07493)  
512 07493 PMID:20383002.
- 513 40. Holdgate GA, Ward WHJ. Measurements of binding thermodynamics in drug discovery. *Drug*  
514 *Discov Today.* 2005;10(22):1543-50. [https://doi:10.1016/s1359-6446\(05\)03610-x](https://doi.org/10.1016/s1359-6446(05)03610-x) PMID:  
515 16257377
- 516 41. D. A. Case TAD, T. E. Cheatham III, C. L. Simmerling, J. Wang, R. L. R. E. Duke, W. Z. R. C.  
517 Walker, K. M. Merz, B. Roberts, S. Hayik, A. Roitberg, J. S. G. Seabra, I. K. A. W. Goetz, F. P.  
518 K. F. Wong, J. Vanicek, R. M. Wolf, J. Liu, S. R. B. X. Wu, T. Steinbrecher, H. Gohlke, Q. Cai,  
519 X. Ye, J. Wang, M.-J. Hsieh, G. Cui, D. R. Roe, D. H. Mathews, M. G. Seetin, R. Salomon-  
520 Ferrer, C. Sagui, V. Babin, T. Luchko, S. Gusarov, A. Kovalenko and P. A. Kollman. Amber 14.  
521 San Francisco: University of California; 2014.
- 522 42. Schrödinger L. The PyMOL molecular graphics system, version 1.8. New York: ; 2015.
- 523 43. Hornak V, Abel R, Okur A, Strockbine B, Roitberg A, Simmerling C. Comparison of multiple  
524 Amber force fields and development of improved protein backbone parameters. *Proteins.*  
525 2006;65(3):712-25. [https://doi:10.1002/prot.21123](https://doi.org/10.1002/prot.21123) PMID:16981200.
- 526 44. Roe DR, Cheatham TE, 3rd. PTRAJ and CPPTRAJ: Software for Processing and Analysis of  
527 Molecular Dynamics Trajectory Data. *Journal of chemical theory and computation.*  
528 2013;9(7):3084-95. [https://doi:10.1021/ct400341p](https://doi.org/10.1021/ct400341p) PMID:26583988.
- 529 45. Junmei Wang, Main M. Wolf, James W, Caldwell, Peter A. Kollman, Case. DA. Development  
530 and Testing of a General Amber Force Field. *J Comput Chem.* 2004;25(9):1157-74.

Inhibiting ClpP1P2 by addressing the equatorial handle domain of ClpP1

---

- 531 [https://doi:10.1002/jcc.20035](https://doi.org/10.1002/jcc.20035) PMID:15116359.
- 532 46. Glykos NM. Software news and updates. Carma: a molecular dynamics analysis program. J  
533 Comput Chem. 2006;27(14):1765-8. [https://doi:10.1002/jcc.20482](https://doi.org/10.1002/jcc.20482) PMID:16917862.
- 534 47. Papaleo E, Mereghetti P, Fantucci P, Grandori R, De Gioia L. Free-energy landscape, principal  
535 component analysis, and structural clustering to identify representative conformations from  
536 molecular dynamics simulations: the myoglobin case. J Mol Graph Model. 2009;27(8):889-99.  
537 [https://doi:10.1016/j.jm gm.2009.01.006](https://doi.org/10.1016/j.jm gm.2009.01.006) PMID:19264523.

538

539

540 **Figures legends**

541 **Fig 1. Cediranib inhibits *Mycobacterium tuberculosis* (*Mtb*) caseinolytic protease**  
542 **P1P2 (*Mtb*ClpP1P2) activity.** (A) Chemical structure of compounds for secondary  
543 screening. (B) Cediranib inhibits *Mtb*ClpP1P2 cleavage of substrate Z-Gly-Gly-Leu-  
544 AMC in a peptidase assay. Concentrations of *Mtb*ClpP1P2 and Z-Gly-Gly-Leu-AMC  
545 were 0.5  $\mu$ M and 100  $\mu$ M, respectively. (C) Noncompetitive inhibition of *Mtb*ClpP1P2  
546 cleavage of Z-Gly-Gly-Leu-AMC by cediranib. Cediranib increased the maximum  
547 reaction velocity ( $V_{max}$ ), but did not affect the Michaelis constant ( $K_m$ ) of the  
548 *Mtb*ClpP1P2 reaction.

549 **Fig 2. Cediranib-bound ClpP1P2 structures.** (A) Side view of the *Mtb*ClpP1P2  
550 tetradecamer. The *Mtb*ClpP1 heptamer (cyan subunits) and *Mtb*ClpP2 heptamer  
551 (orange subunits) are shown in cartoon representation. Spheres represent cediranib  
552 molecules (green) bound to the *Mtb*ClpP1 ring and Bz-Leu-Leu (Bz-LL) peptide  
553 (yellow) bound to the active sites of both rings. (B) Top panel, axial view of the  
554 *Mtb*ClpP1P2 tetradecamer from the *Mtb*ClpP1 side; bottom panel, axial view of the  
555 *Mtb*ClpP1P2 tetradecamer from the *Mtb*ClpP2 side. (C) *Mtb*ClpP1P2 monomer  
556 magnified from cediranib-bound *Mtb*ClpP1P2 structure. Secondary structure elements  
557 are labeled. The *Mtb*ClpP1P2 handle region and the catalytic triad residues are labeled.  
558 Cediranib and Bz-LL are colored green and yellow, respectively.

559 **Fig 3. Structural details of cediranib binding pocket in *Mtb*ClpP1.** (A) The activator  
560 is bound in opposite orientations in *Mtb*ClpP1 and *Mtb*ClpP2. Bz-LL in *Mtb*ClpP1 is  
561 colored yellow and Bz-LL in *Mtb*ClpP2 is colored gray. (B) 2Fo-Fc electron-density  
562 map of cediranib in *Mtb*ClpP1. (C) Surface representation of the *Mtb*ClpP1P2  
563 tetradecamer with bound cediranib reveals that cediranib binds in a novel site. (D) A  
564 cartoon representation of the cediranib interactions with *Mtb*ClpP1. (E) Molecular  
565 interactions between cediranib and residues in the binding pocket. Cediranib does not  
566 interact directly with the active site, but interferes with the presumably defined  
567 equatorial pores and dynamic handle regions. (F) Detailed view of the cediranib-bound

568 pocket formed by residues Gln142–Glu149 in  $\alpha 5$ , Ile71–Ala76 in  $\alpha 3$ , and three short  $\beta$ -  
569 sheets ( $\beta D$ ,  $\beta F$ ,  $\beta H$ ) from the neighboring *MtbClpP1* subunit.

570 **Fig 4. Importance of the handle domain and analysis of distinct ClpP sequences.**

571 Importance of the handle domain and analysis of distinct ClpP sequences. (A)  
572 Superposition and ribbon representation of the monomeric structures of *MtbClpP1*  
573 (cyan), *MtbClpP2* (orange), *Staphylococcus aureus* (Sa)ClpP (green), *Escherichia coli*  
574 (Ec)ClpP (light blue), *Listeria monocytogenes* (Lm)ClpP1 (pink), LmClpP2 (magenta),  
575 and human (h)ClpP (gray). (B) *MtbClpP1P2* side views. Mutant residue sites are labeled.  
576 Spheres represent cediranib molecules (green) bound to the *MtbClpP1* ring and Bz-Leu-  
577 Leu (Bz-LL) peptide (yellow) bound to the active sites of both rings. (C) Sequence  
578 alignment and secondary structure assignment of ClpPs. Sequence alignment was  
579 performed in BioEdit. Identical residues are highlighted in blue. Secondary structure  
580 elements present in the *MtbClpP1P2* structure (PDB code 6IW7) are shown on the top  
581 of the sequence alignment.



582 **Supporting Information**

583 **S1 Table. Plasmids used in this study.**

584 (DOCX)

585 **S2 Table. Primers used in this study.**

586 (DOCX)

587 **S3 Table. Strains used in this study.**

588 (DOCX)

589 **S1 Fig. Differential scanning calorimetry analysis of the binding between**

590 **cediranib and *Mtb*ClpP1P2.** The concentrations of bortezomib and cediranib were 100

591  $\mu$ M.

592 (TIF)

593 **S2 Fig. Inhibition of cediranib against *Ec*ClpP, *Sa*ClpP, *Pa*ClpP and *h*ClpP.**

594 (A) Inhibition of cediranib on *Ec*ClpP. Concentration of *Ec*ClpP was 0.5 $\mu$ M. (B)

595 Inhibition of cediranib on *Sa*ClpP. Concentration of *Sa*ClpP was 2.5  $\mu$ M. (C) Inhibition

596 of cediranib on *Pa*ClpP. Concentration of *Pa*ClpP was 0.5  $\mu$ M. (D) IC<sub>50</sub> value of

597 cediranib against *h*ClpP. Concentration of *h*ClpP was 2.5 $\mu$ M.

598 (TIF)

599 **S3 Fig. Conformational changes of *Mtb*ClpP1 dimer.**

600 (A,C). C $\alpha$  RMSD values of the head domain and handle domain in *Mtb*ClpP1 dimer

601 versus simulation time without (A)or with cediranib(C). The RMSD values of the head

602 domain and handle domain are shown in green and red, respectively. (B,D). Secondary

603 structures as a function of time for *Mtb*ClpP1 dimer without (B)or with cediranib(D) in

Inhibiting ClpP1P2 by addressing the equatorial handle domain of ClpP1

---

604 trajectory as calculated using DSSP. The structures were analyzed every 100 ps. (E,F).  
605 Left, energy landscape for the conformational transition of *Mtb*ClpP1 dimer without  
606 (E)or with cediranib(F). Reaction coordinates were defined according to PC1 and PC2  
607 obtained from PCA. Right, snapshot structures of  $\alpha 5$  from *Mtb*ClpP1 dimer without  
608 (E)or with cediranib(F) extracted from the trajectory.  
609 (TIF)  
610

611 **Table 1. Minimum inhibitory concentrations (MIC) against different bacterial**  
612 **strains and the inhibition of ClpP peptidase activity by cediranib.**

| <b>Organism</b>                         | <b>MIC (µg/mL)</b> | <b>IC<sub>50</sub> (µM)</b> | <b>Selectivity Index<sup>b</sup></b> |
|-----------------------------------------|--------------------|-----------------------------|--------------------------------------|
| <i>M. tuberculosis</i> H37Rv            | 16                 | 3.4±0.7                     | /                                    |
| <i>M. smegmatis</i> MC <sup>2</sup> 155 | 64                 | NT <sup>a</sup>             | NT                                   |
| <i>E. coli</i>                          | >128               | >100                        | >30                                  |
| <i>S. aureus</i>                        | >128               | >100                        | >30                                  |
| <i>P. aeruginosa</i>                    | >128               | >100                        | >30                                  |
| <i>Homo sapiens</i>                     | /                  | 36.6±0.5                    | 10.8                                 |

613 <sup>a</sup> NT, not tested. <sup>b</sup> Selectivity Index calculated as Cediranib IC<sub>50</sub> of ClpPs / cediranib

614 IC<sub>50</sub> of *Mtb*ClpP1P2.

615

616 **Table 2. Minimum inhibitory concentration of cediranib against different strains.**

| Strains                           |            | Cediranib<br>( $\mu\text{g/mL}$ ) | Linezolid<br>( $\mu\text{g/mL}$ ) | Rifampin<br>( $\mu\text{g/mL}$ ) | Bortezomib<br>( $\mu\text{g/mL}$ ) |
|-----------------------------------|------------|-----------------------------------|-----------------------------------|----------------------------------|------------------------------------|
| <i>Escherichia coli</i>           | ATCC25922  | >128                              | >128                              | 4                                | >128                               |
|                                   | ATCC35218  | >128                              | >128                              | 4                                | >128                               |
| <i>Staphylococcus aureus</i>      | ATCC33591  | >128                              | 2                                 | 0.06                             | >128                               |
|                                   | ATCC25923  | >128                              | 2                                 | 0.06                             | >128                               |
| <i>Staphylococcus epidermidis</i> | B27        | 64                                | 1                                 | 0.06                             | >128                               |
|                                   | ATCC12228  | 64                                | 1                                 | 0.06                             | >128                               |
| <i>Enterococcus faecalis</i>      | ATCC33186  | >128                              | 2                                 | 4                                | >128                               |
| <i>Enterococcus faecium</i>       | ATCC35667  | 128                               | 2                                 | 16                               | >128                               |
| <i>Pseudomonas aeruginosa</i>     | ATCC27853  | >128                              | >128                              | 32                               | >128                               |
|                                   | C58        | >128                              | >128                              | 32                               | >128                               |
| <i>Klebsiella pneumoniae</i>      | ATCC4352   | 64                                | 32                                | 8                                | >128                               |
|                                   | ATCC700603 | >128                              | >128                              | 32                               | >128                               |

617 **Overall structure of cediranib-bound *Mtb*ClpP1P2**

618

619 **Table 3. Data collection and refinement statistics.**

| Parameters                                                       | <i>Mtb</i> ClpP1P2 Cediranib Bz-LL |
|------------------------------------------------------------------|------------------------------------|
| <b>Data collection</b>                                           |                                    |
| Space group                                                      | <i>C121</i>                        |
| a, b, c(Å)                                                       | 210.63 180.78 95.93                |
| α, β, γ(°)                                                       | 90.00 95.72 90.00                  |
| Wavelength(Å)                                                    | 0.97915                            |
| Resolution(Å)                                                    | 40.00 - 2.69(2.69 - 2.60)          |
| CC <sub>1/2</sub>                                                | 0.986(0.376)                       |
| Unique reflections                                               | 96900(9595)                        |
| <i>R</i> <sub>meas</sub> (%) <sup>a</sup>                        | 20.8(134)                          |
| Mean <i>I</i> /σ( <i>I</i> ) <sup>a</sup>                        | 8.04(1.04)                         |
| Completeness(%) <sup>a</sup>                                     | 98.6(98.2)                         |
| Redundancy                                                       | 4.9(4.1)                           |
| <b>Refinement</b>                                                |                                    |
| Resolution(Å)                                                    | 39.84 – 2.69                       |
| <i>R</i> <sub>work</sub> / <i>R</i> <sub>free</sub> <sup>b</sup> | 0.2002/0.2433                      |
| No.atoms                                                         |                                    |
| Protein                                                          | 19747                              |
| Cediranib                                                        | 413                                |
| Z-LL                                                             | 350                                |
| Water                                                            | 187                                |
| β-factors                                                        |                                    |
| Protein                                                          | 49.86                              |
| Cediranib                                                        | 68.36                              |
| Z-LL                                                             | 55.26                              |
| Water                                                            | 48.67                              |
| R.m.s. deviations                                                |                                    |
| Bond lengths(Å)                                                  | 0.009                              |
| Bond angles(°)                                                   | 1.097                              |
| Ramachandran plot                                                |                                    |
| Favored (%)                                                      | 97.08                              |
| Allowed (%)                                                      | 2.73                               |
| Outliers (%)                                                     | 0.19                               |

620 <sup>a</sup> The values in parentheses are for the outermost shell.

621 <sup>b</sup> *R*<sub>free</sub> is the *R*<sub>work</sub> based on 5% of the data excluded from the refinement.

622  $R_{\text{meas}} = \frac{\sum_{hkl} \sqrt{n/(n-1)} \sum_{i=1}^n |I_i(hkl) - \langle I(hkl) \rangle|}{\sum_{hkl} \sum_i I_i(hkl)}$ , where  $\langle I(hkl) \rangle$   
623 is the mean intensity of a set of equivalent reflections.

624  $R_{\text{work}} = \frac{\sum_{hkl} |F_{\text{obs}}| - |F_{\text{calc}}|}{\sum_{hkl} |F_{\text{obs}}|}$ , where *F*<sub>obs</sub> and *F*<sub>calc</sub> are observed and  
625 calculated structure factors, respectively.

626 **Table 4. Mutagenesis analysis of *MtbClpP1*.**

| Mutant | Activity           | IC <sub>50</sub> (μM) | Cediranib inhibition |
|--------|--------------------|-----------------------|----------------------|
| /      | +++++ <sup>a</sup> | 3.4±0.7               | C <sup>c</sup>       |
| I71F   | – <sup>b</sup>     |                       |                      |
| I71V   | +/-                | >54.5                 | R <sup>d</sup>       |
| S72T   | +                  | NT <sup>e</sup>       |                      |
| M75A   | –                  |                       |                      |
| M75F   | –                  |                       |                      |
| M75L   | +                  | NT                    |                      |
| M75D   | N/A <sup>f</sup>   |                       |                      |
| M95A   | –                  |                       |                      |
| M95Q   | +++++++            | 23.7±0.7              | R                    |
| M95L   | ++++               | 7.5±0.9               | C                    |
| M95W   | –                  |                       |                      |
| M95S   | +/-                | >50                   | R                    |
| R119E  | –                  |                       |                      |
| R119Q  | +                  | 42.2±0.7              | R                    |
| R119S  | ++                 | 14.4±0.7              | C                    |
| Q142H  | +++                | 9.5±0.7               | C                    |
| Q142R  | –                  |                       |                      |
| I146M  | –                  |                       |                      |
| I146V  | +                  | 5.1±0.7               | C                    |
| I146T  | +                  | 9.7±1.3               | C                    |
| I146L  | –                  |                       |                      |
| E149L  | ++++               | 41.8±0.9              | R                    |
| E149R  | +                  | >100                  | R                    |
| E149K  | +                  | 6.3±0.7               | C                    |
| E149Q  | +++++              | 7.6±0.9               | C                    |
| E149 T | +++                | 12.8±0.8              | C                    |
| W174I  | –                  |                       |                      |
| W174F  | +/-                | 20.2±0.7              | R                    |
| W174A  | –                  |                       |                      |

627 <sup>a</sup> +, Having enzyme activity (the more plus signs, the higher the activity); <sup>b</sup> –, No  
628 enzyme activity; <sup>c</sup> C, similar to wild-type *MtbClpP1* (the control); <sup>d</sup> R, more resistant  
629 than wild-type *MtbClpP1* (R is defined as IC<sub>50</sub> value of mutant protein/IC<sub>50</sub> value of  
630 wild-type protein >5); <sup>e</sup> NT, not tested; <sup>f</sup> N/A, protein unstable.

Inhibiting ClpP1P2 by addressing the equatorial handle domain of ClpP1

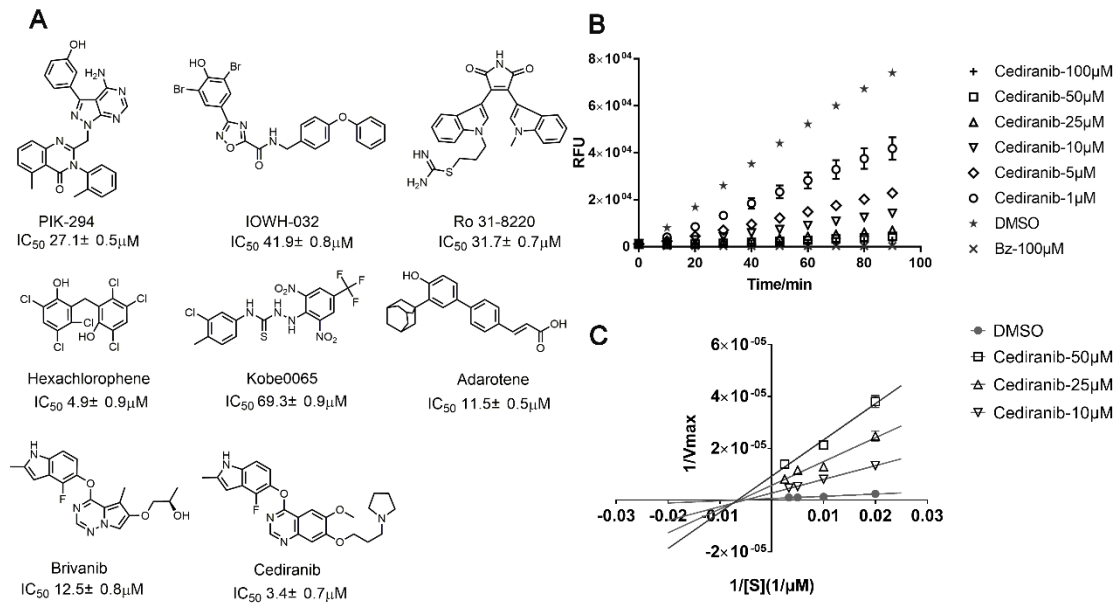

631

632

633

**Figure 1**

Inhibiting ClpP1P2 by addressing the equatorial handle domain of ClpP1

634

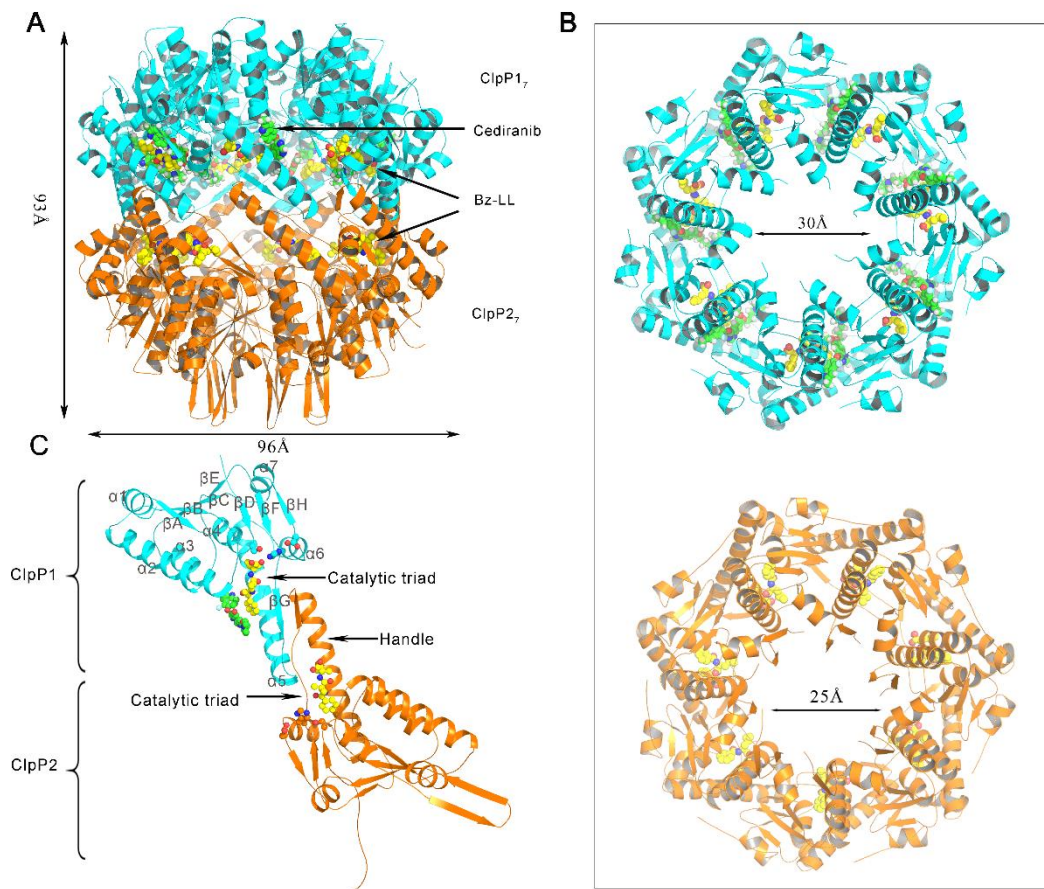

635

636

637

Figure 2



Inhibiting ClpP1P2 by addressing the equatorial handle domain of ClpP1

638

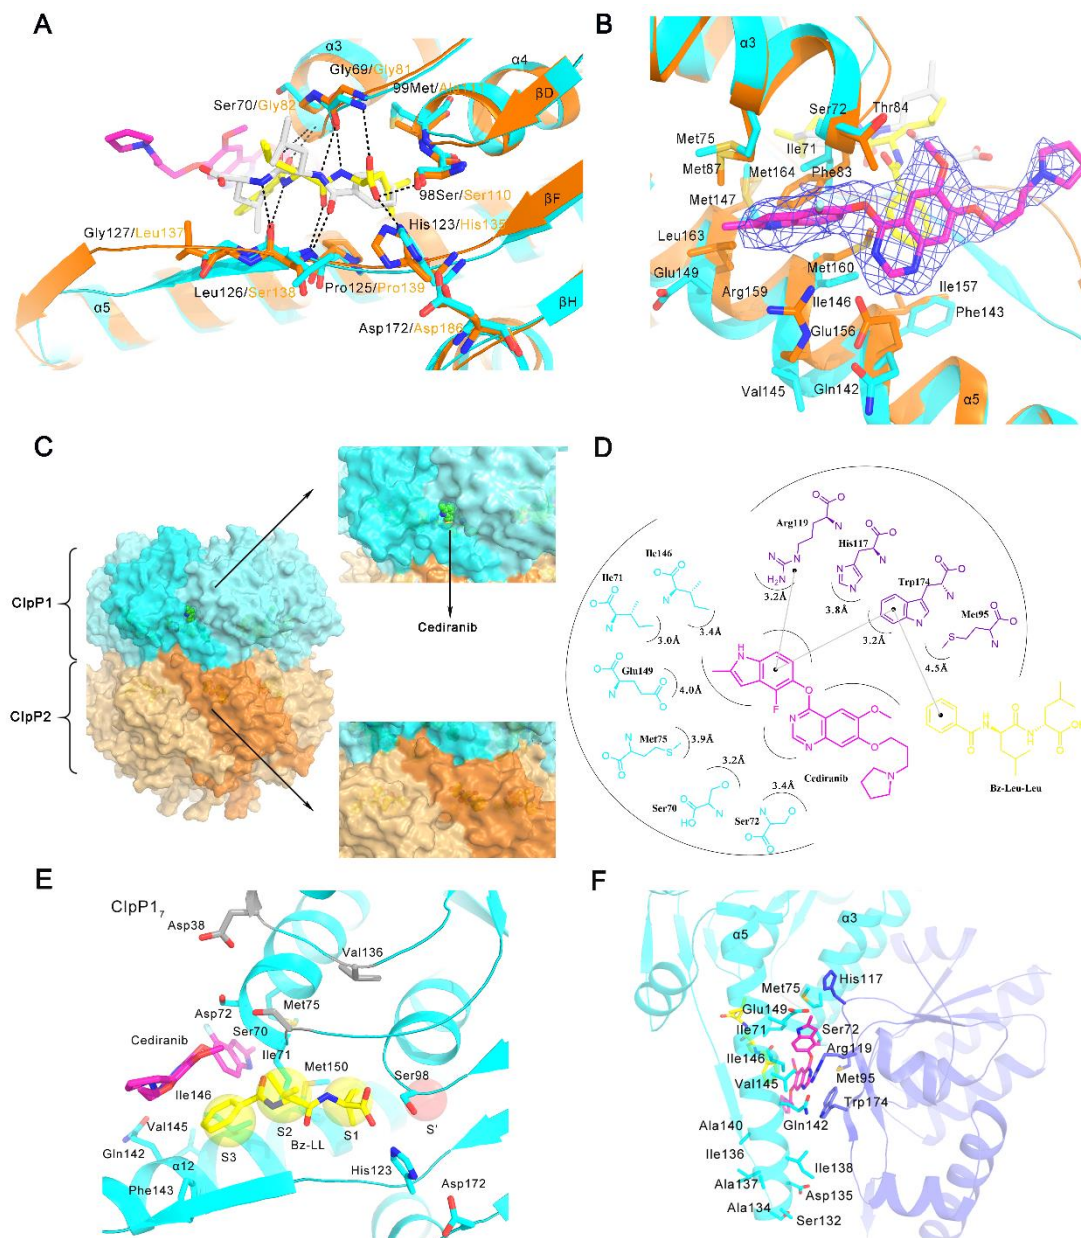

639

640

641

Figure 3

Inhibiting ClpP1P2 by addressing the equatorial handle domain of ClpP1

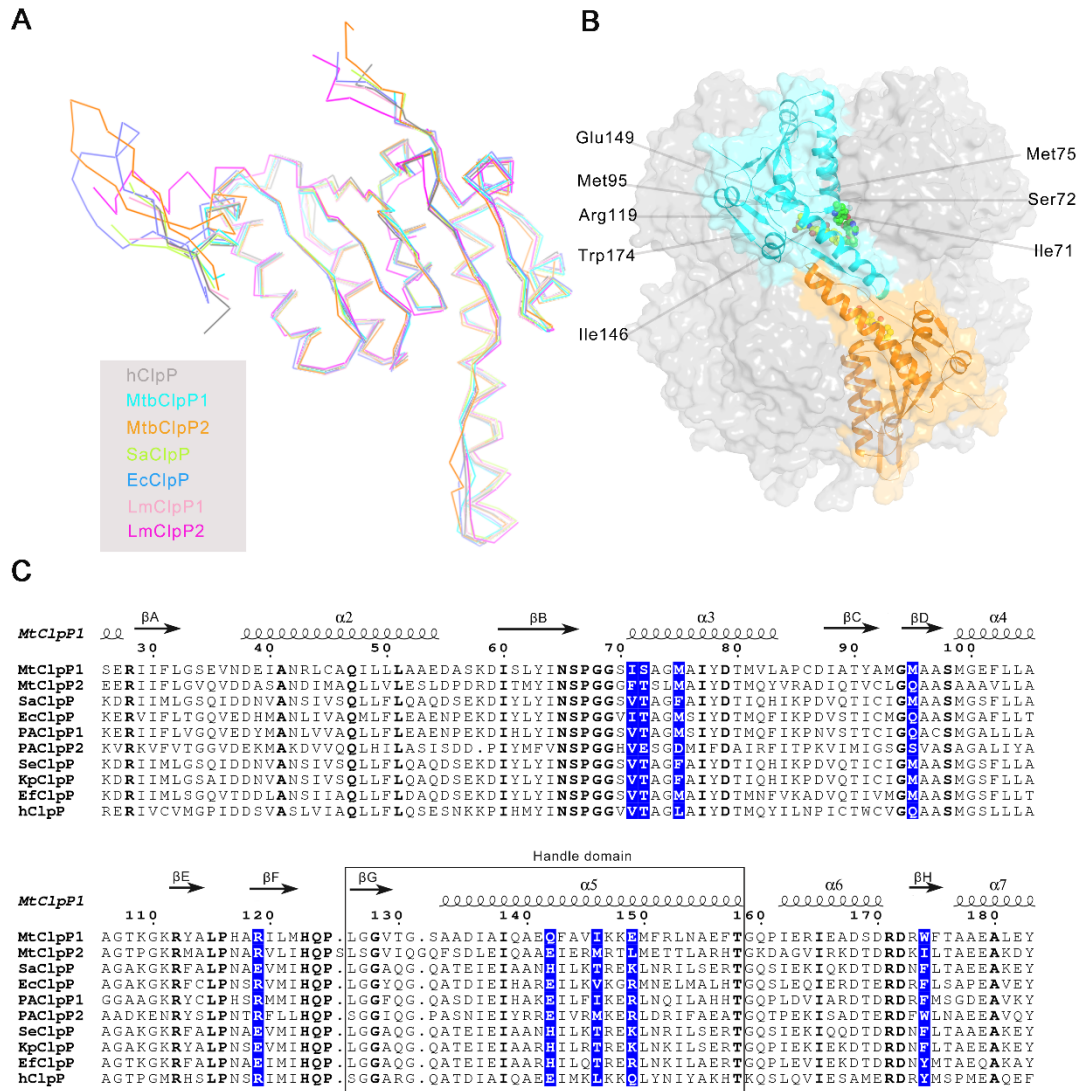

642

643

Figure 4

644

645

646 **S1 Table. Plasmids used in this study.**

---

| <b>Plasmid</b>               | <b>Feature</b>                                    | <b>Reference</b> |
|------------------------------|---------------------------------------------------|------------------|
| pRSF-duet-1- <i>MtbClpP1</i> | For expressing <i>MtbClpP1</i> protein            | This study       |
| pRSF-duet-1- <i>MtbClpP2</i> | For expressing <i>MtbClpP2</i> protein            | This study       |
| pRSF-duet-1- <i>EcClpP</i>   | For expressing <i>EcClpP</i> protein              | This study       |
| pRSF-duet-1- <i>PaClpP1</i>  | For expressing <i>PaClpP1</i> protein             | This study       |
| pRSF-duet-1- <i>SaClpP</i>   | For expressing <i>SaClpP</i> protein              | This study       |
| pRSF-duet-1- <i>hClpP</i>    | For expressing <i>hClpP</i> ( $\Delta$ C) protein | This study       |

---

647

648

649 **S2 Table. Primers used in this study.**

| Gene                     | Primers                                         |
|--------------------------|-------------------------------------------------|
| <i>Mtb</i> ClpP1-Forward | CAGATTGGTGGATCCATGCGTTCGAACTCGC<br>AG           |
| <i>Mtb</i> ClpP1-Reverse | TTTACCAGACTCGAGTCACTGTGCTTCTCCA<br>TTGAC        |
| <i>Mtb</i> ClpP2-Forward | CAGATTGGTGGATCCCGCTACATCCTGCCGT<br>CGTTC        |
| <i>Mtb</i> ClpP2-Reverse | TTTACCAGACTCGAGTCAGGCGGTTTGC GCG<br>GAGAG       |
| RSF-duet-1-Forward       | CTCGAGTCTGGTAAAGAAACCG                          |
| RSF-duet-1- Reverse      | GGATCCACCAATCTGTTCTCTG                          |
| <i>h</i> ClpP- Forward   | GAGAACAGATTGGTGGATCCCCGCTCATTCC<br>CATCGTG      |
| <i>h</i> ClpP- Reverse   | GTTTCTTTACCAGACTCGAGGGTGCTAGCTG<br>GGACAGGTTC   |
| <i>Ec</i> ClpP- Forward  | GAGAACAGATTGGTGGATCCATGTCATAACA<br>GCGGCGAAC    |
| <i>Ec</i> ClpP- Reverse  | GTTTCTTTACCAGACTCGAGTCAATTACGAT<br>GGGTCAGAATC  |
| <i>Pa</i> ClpP1- Forward | GAGAACAGATTGGTGGATCCATGTCTCGCA<br>ACTCTTTTAT TC |
| <i>Pa</i> ClpP1- Reverse | GTTTCTTTACCAGACTCGAGTTAGACGGCCA<br>G GTCGCGCTG  |
| I71V- Forward            | GTC AGCGCCGGCATGGCGATC                          |
| I71V- Reverse            | CGATCCACCCGGCGAATTGAT                           |
| M75L- Forward            | CTT GCGATCTACGACACCATG                          |
| M75L- Reverse            | GCCGGCGCTGATCGATCCAC                            |

Inhibiting ClpP1P2 by addressing the equatorial handle domain of ClpP1

|                        |                                                   |
|------------------------|---------------------------------------------------|
| M75D- Forward          | GAC GCGATCTACGACACCATG                            |
| M75D- Reverse          | GCCGGCGCTGATCGATCCAC                              |
| M95L- Forward          | C TT GCCGC CTCGATGGGC GAG                         |
| M95L/W/S- Reverse      | GCCCATCGCG TAGGTGGC                               |
| M95W- Forward          | T GG GCCGC CTCGATGGGC GAG                         |
| M95S- Forward          | TCG GCCGC CTCGATGGGC GAG                          |
| R119E- Forward-1       | GAAATCCTGATGCACCAGCCG                             |
| R119E/Q/S-Reverse-1    | AGCATGCGGCAGCGCGTAG                               |
| R119Q-Forward-1        | CAG ATCCTGATGCACCAGCCG                            |
| R119S- Forward-1       | TCG ATCCTGATGCACCAGCCG                            |
| R119E-Forward-2        | GCTACGCGCTGCCGCATGCTGAAATCCTGAT<br>GCACC AGCCGTTG |
| R119Q-Forward-1        | GCTACGCGCTGCCGCATGCTCAGATCCTGAT<br>GCACCAGCCGTTG  |
| R119S- Forward-1       | GCTACGCGCTGCCGCATGCTTCGATCCTGAT<br>GCACC AGCCGTTG |
| R119E/Q/S-Reverse-2    | AGCATGCGGCAGCGCGTAG                               |
| E142H- Forward         | CACTTCGCCGTGATCAAGAAAG                            |
| E142H- Reverse         | CTCGGCCTGGATGGCGATATC                             |
| E142R- Forward         | CGC TTCGCCGTGATCAAGAAAG                           |
| E142R- Reverse         | CTCGGCCTGGATGGCGATATC                             |
| I146V- Forward         | GTC AAGAAAGAAATGTTCCGGC                           |
| I146V/L/T- Reverse     | CACGGCGAACTGCTCGGC                                |
| I146L- Forward         | C TT AAGAAAGAAATGTTCCGGC                          |
| I146T- Forward         | ACT AAGAAAGAAATGTTCCGGC                           |
| E149L- Forward         | CTTATGTTCCGGCTCAACGCCG                            |
| E149L/R/K/Q/T- Reverse | TTTCTTGATCACGGCGAACTG                             |
| E149R- Forward         | CGC ATGTTCCGGCTCAACGCCG                           |
| E149K- Forward         | AA G ATGTTCCGGCTCAACGCCG                          |

Inhibiting ClpP1P2 by addressing the equatorial handle domain of ClpP1

---

|                 |                         |
|-----------------|-------------------------|
| E149Q- Forward  | CAG ATGTTCCGGCTCAACGCCG |
| E149 T- Forward | ACT ATGTTCCGGCTCAACGCCG |

650

651 **S3 Table. Strains used in this study.**

| Strains                                               | Feature                      | Source                        |
|-------------------------------------------------------|------------------------------|-------------------------------|
| <i>E. coli</i> strains DH5 $\alpha$                   | For amplification of plasmid | TransGen Biotech              |
| <i>E. coli</i> strains BL21(DE3)                      | For expressing protein       | TransGen Biotech              |
| <i>Staphylococcus aureus</i>                          | MIC                          | ATCC33591<br>ATCC25923<br>B27 |
| <i>Staphylococcus epidermidis</i>                     | MIC                          | ATCC12228                     |
| <i>Enterococcus faecalis</i>                          | MIC                          | ATCC33186                     |
| <i>Enterococcus faecium</i>                           | MIC                          | ATCC35667                     |
| <i>Pseudomonas aeruginosa</i>                         | MIC                          | ATCC27853<br>C58<br>ATCC4352  |
| <i>Klebsiella pneumoniae</i>                          | MIC                          | ATCC700603<br>ATCC25922       |
| <i>Escherichia coli</i>                               | MIC                          | ATCC35218                     |
| <i>Mycobacterium smegmatis</i><br>MC <sup>2</sup> 155 | MIC                          | ATCC 700084                   |
| <i>Mycobacterium tuberculosis</i><br>H37Rv            | MIC                          | ATCC 27294                    |

652

653

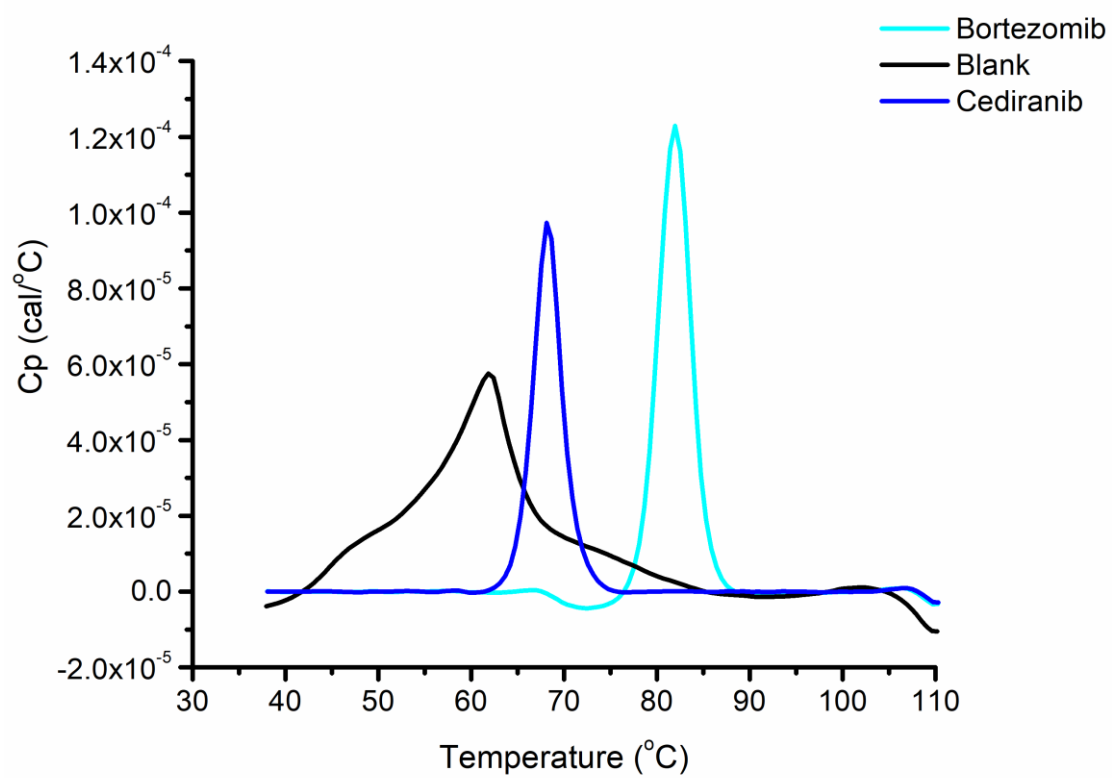

654

655

**S1 Fig**

656



Inhibiting ClpP1P2 by addressing the equatorial handle domain of ClpP1

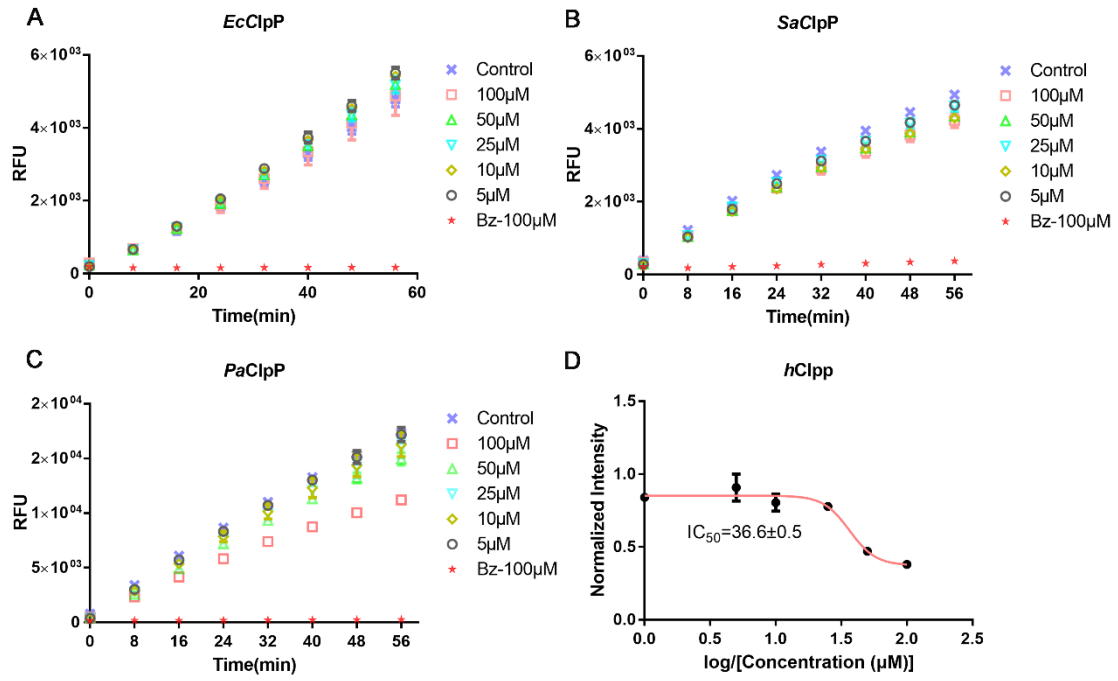

657

658

659

S2 Fig

Inhibiting ClpP1P2 by addressing the equatorial handle domain of ClpP1

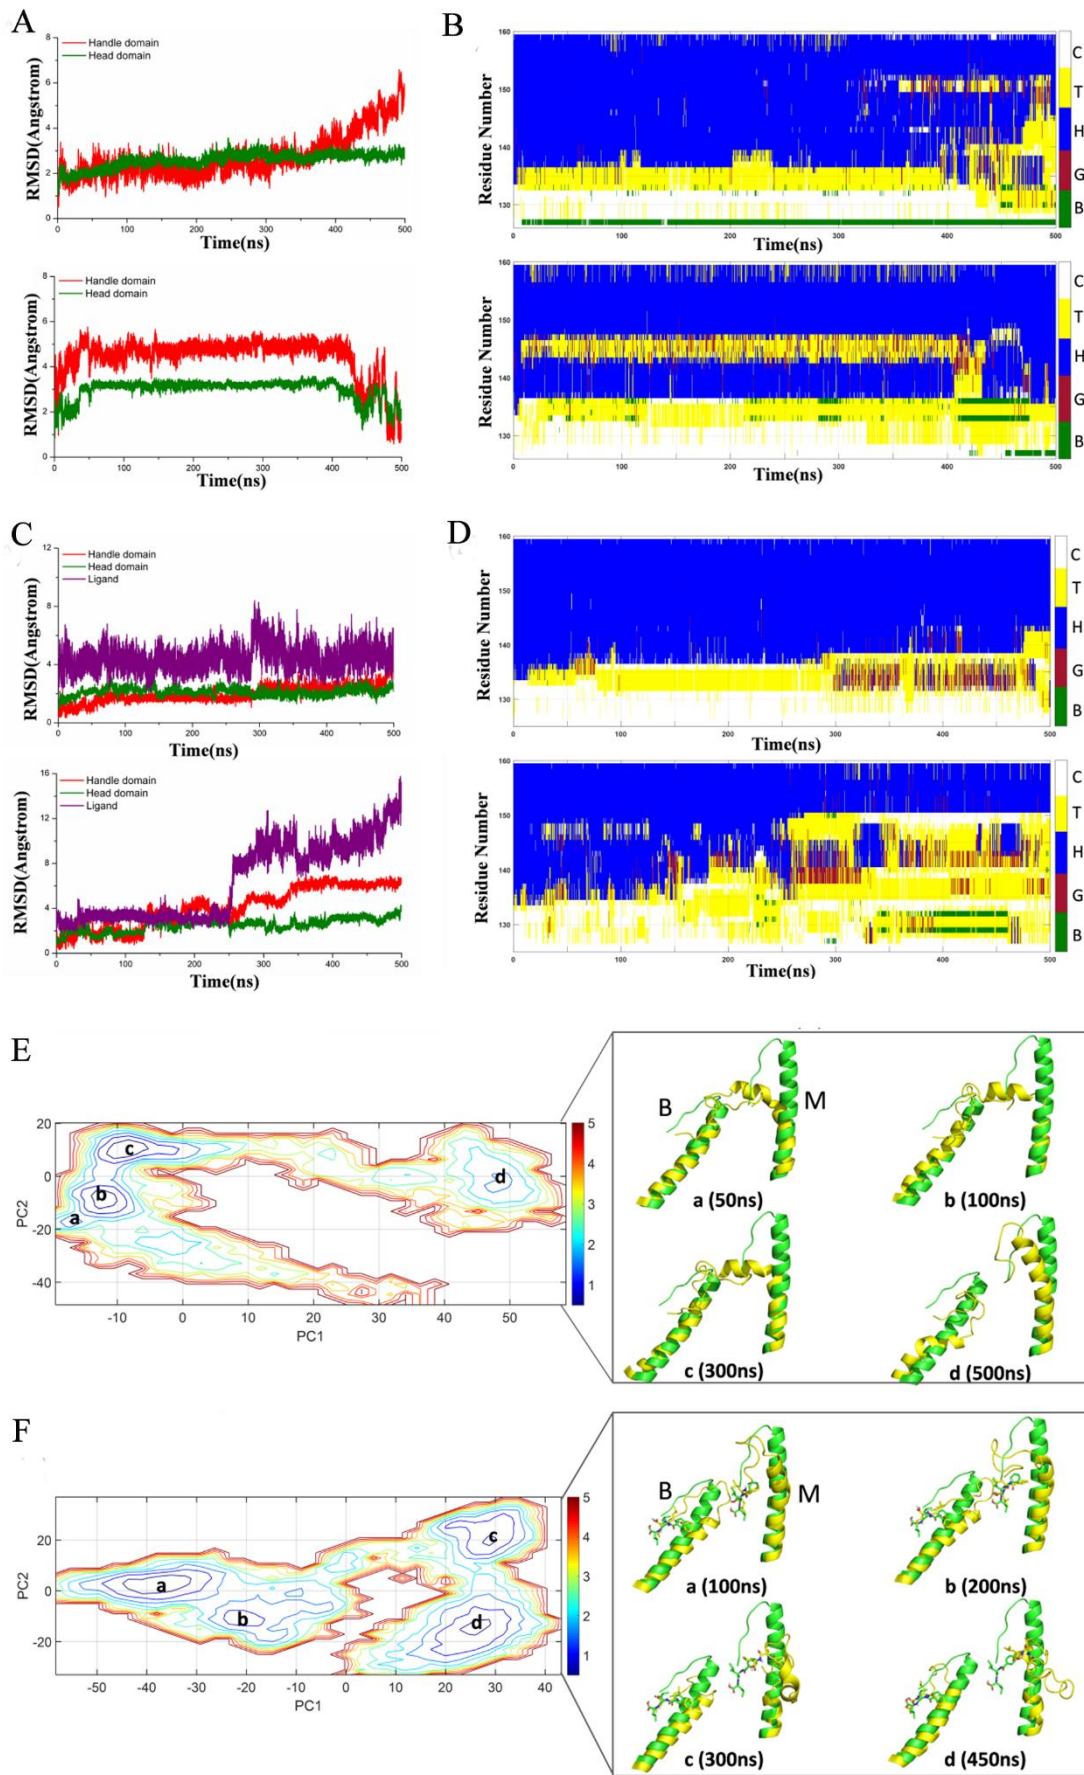

660

661

S3 Fig

42 / 42
